# Supplementary material for: Measles Virus-Based Vaccine Expressing Membrane-Anchored Spike of SARS-CoV-2 Inducing Efficacious Systemic and Mucosal Humoral Immunity in Hamsters
Source: MDPI journal article supplement (doi:10.3390/v16040559), 2024-04-03
Supplement: s1 [file s1]

Supplementary Figures

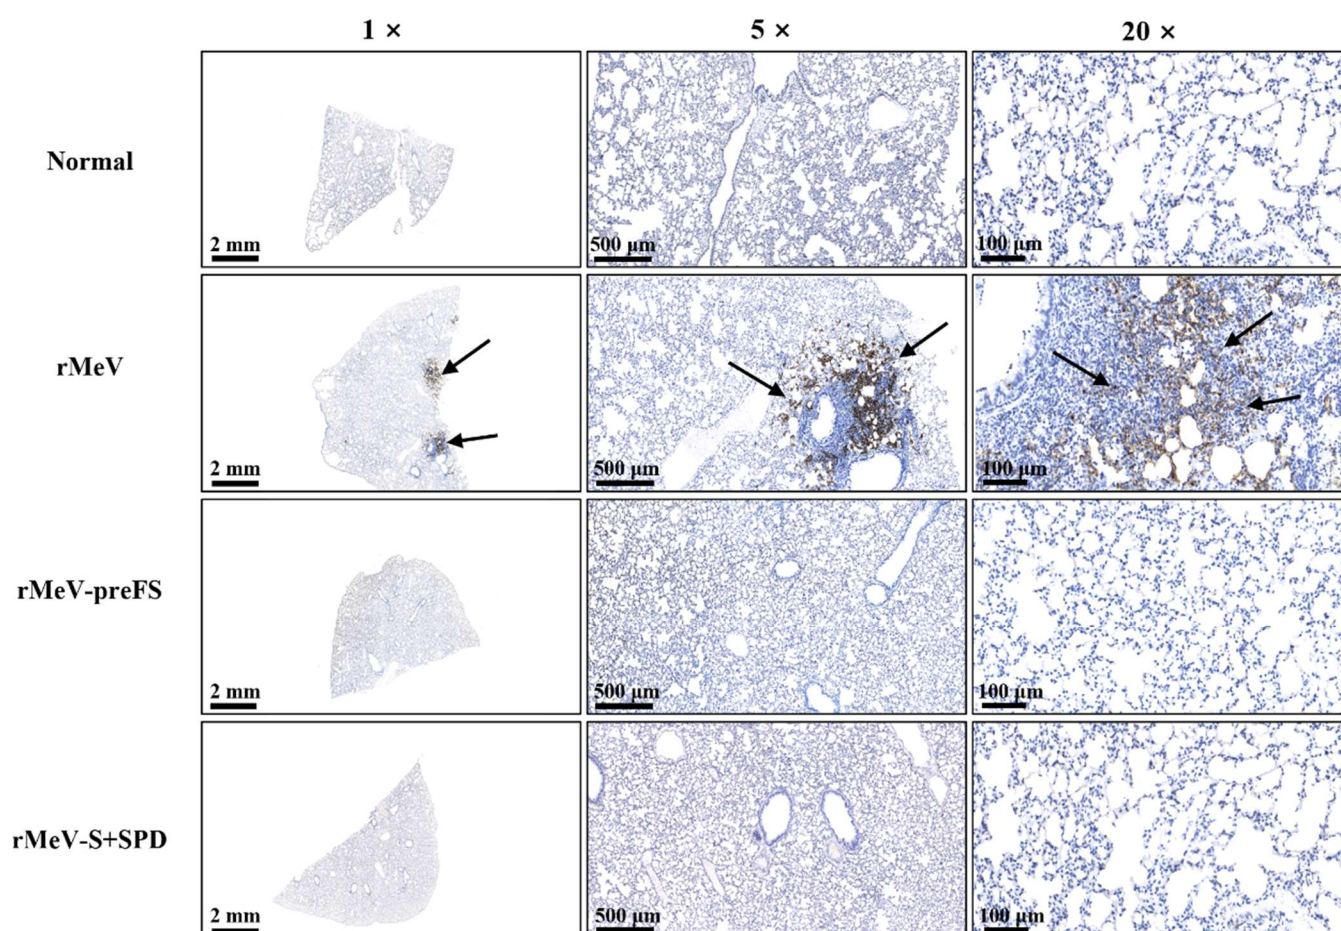

**Figure S1.** Omicron BA.2 viral protein expression in lungs of hamsters. IHC staining of SARS-CoV-2 N protein in the lung tissues of hamsters were shown. Micrographs of 1 ×, 5 ×, and 10 × magnifications of a representative lung section from each group are shown. Omicron BA.2 viral protein expression was indicated by arrows. Scale bars are indicated at the left corner of each image.
